# Supplementary material
Source: PubMed Central journal article supplement (PMC5467722)

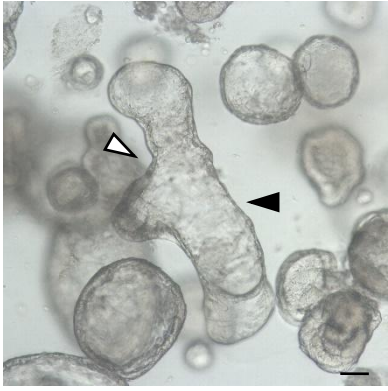

Supplement: NIHMS72841-supplement-Supplementary_Fig_1.pdf [file NIHMS72841-supplement-Supplementary_Fig_1.pdf]

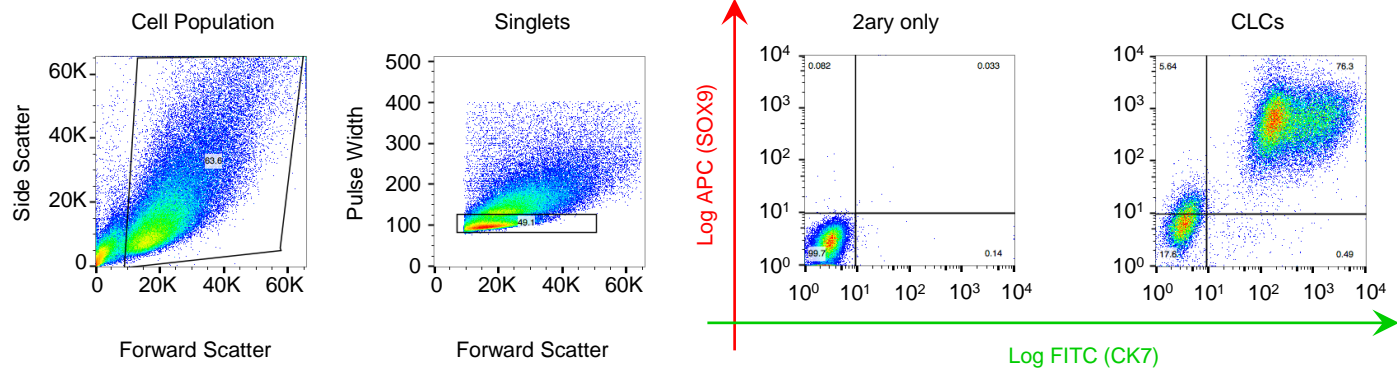

Supplement: NIHMS72841-supplement-Supplementary_Fig_2.pdf [file NIHMS72841-supplement-Supplementary_Fig_2.pdf]
